# Supplementary material for: Magnesium oxide nanosheets as effective catalysts for the synthesis of diethyl carbonate from ethyl carbamate and ethanol
Source: Royal Society of Chemistry journal article supplement (doi:10.1039/c4cy01109k), 2014-10-03
Supplement: c4cy01109k1.pdf [file c4cy01109k1.pdf]

## Supporting Information

### Nanosheet magnesium oxide as an effective catalyst on the synthesis of diethyl carbonate from ethyl carbamate and ethanol

Fengjiao Li,<sup>ab</sup> Huiquan Li,<sup>\*a</sup> Ligu Wang,<sup>a</sup> Peng He,<sup>a</sup> and Yan Cao<sup>a</sup>

<sup>a</sup> Key Laboratory for Green Process and Engineering, National Engineering Laboratory for Hydrometallurgical Cleaner Production Technology, Institute of Process and Engineering, Chinese Academy of Sciences, Beijing 100190, China.

<sup>b</sup> University of Chinese Academy of Sciences, Beijing 100049, China.

\* Corresponding author. E-mail: hqli@ipe.ac.cn. Tel: +86 10 82544825; Fax: +86 10 62621355.

#### S1. Models:

The optimized geometrical structure of (a) MgO (100) surface ; (b) EC molecule; (c) ethanol molecule are as follows. For clarity, the main atoms of the adsorbed molecules are labeled and the oxygen atom of MgO is labeled as O<sub>M</sub>, as shown in Fig. S1.

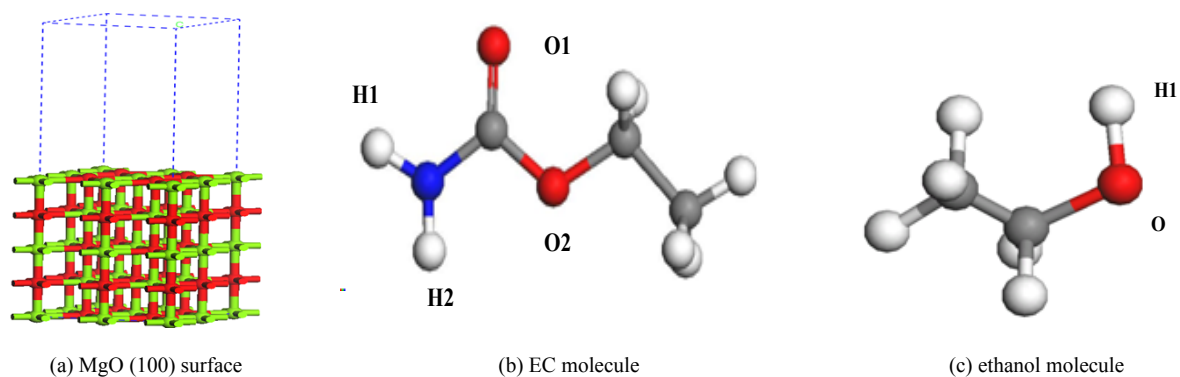

**Fig. S1** Optimized geometrical structure of (a) MgO (100) surface, (b) EC molecule, and (c) ethanol molecule

## S2. Mastersizer 2000

Particle size of MgO-SC-450 sample was analyzed using particle size analyzer model Mastersizer 2000. The volume mean particle diameter ( $d_{50}$ ) was used to express the mean particle size of MgO-SC-450. It means that the volume of particles below  $d_{50}$  size is half of the total volume of the sample. The result yields an average particle size of 21  $\mu\text{m}$  (about 600 mesh). In this case, Mastersizer 2000 measures the agglomerations instead of crystallites.

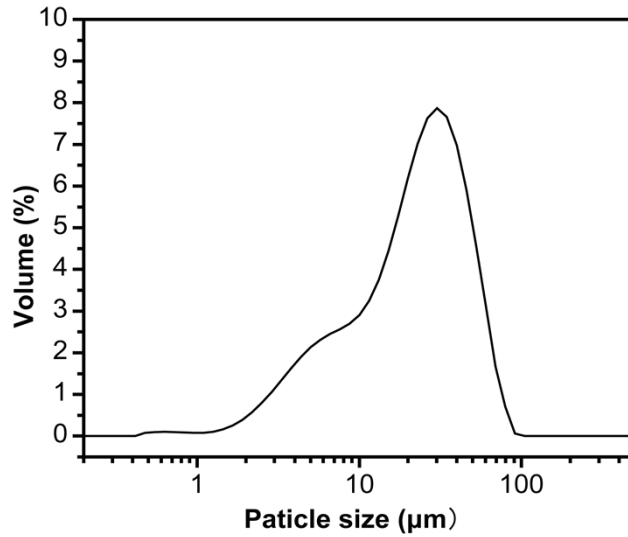

Fig. S2 Size distribution of MgO-SC-450.
